# Supplementary material for: Genomic Characteristics and E Protein Bioinformatics Analysis of JEV Isolates from South China from 2011 to 2018
Source: MDPI journal article supplement (doi:10.3390/vaccines10081303), 2022-08-12
Supplement: s1 [file s1]

## Supplement

**Table S1. Referenced JEV strains used in this experiment**

| GenBank    | strain        | Genome length (bp) | Country   | Year |
|------------|---------------|--------------------|-----------|------|
| MH165313.1 | anheal        | 10965              | China     | 2017 |
| JF706270.1 | BL06-50       | 10965              | China     | 2006 |
| JF706272.1 | DL04-29       | 10977              | China     | 2004 |
| JF706273.1 | Fj02-29       | 10977              | China     | 2002 |
| JN381867.1 | Fj0276        | 10977              | China     | 2002 |
| JN381859.1 | Fj0339        | 10977              | China     | 2003 |
| AF217620.1 | FU            | 10964              | Australia | 1995 |
| MF326270.1 | GD            | 10977              | China     | 2008 |
| KF297915.1 | GD-01         | 10976              | China     | 2009 |
| JN381843.1 | GS07TS11      | 10965              | China     | 2007 |
| JF706274.1 | GSBY0801      | 10965              | China     | 2008 |
| JN381857.1 | GZ042         | 10977              | China     | 2004 |
| HM366552.1 | GZ56          | 10965              | China     | 2006 |
| JF706276.1 | HLJ02-134     | 10977              | China     | 2002 |
| JN381831.1 | HN0411        | 10965              | China     | 2004 |
| JN381830.1 | HN0621        | 10965              | China     | 2006 |
| AY184212.1 | JKT6468       | 10978              | China     | 1981 |
| LC461957.1 | MQ-amaguchi   | 10965              | Japan     | 2016 |
| HM596272.1 | Muar          | 10988              | Malaysia  | 1952 |
| MH258849.1 | SA14-14-2 MSV | 10977              | China     | 2018 |
| JN381839.1 | SC0412        | 10964              | China     | 2004 |
| JF706286.1 | SD0810        | 10965              | China     | 2008 |
| JN381850.1 | SH53          | 10965              | China     | 2001 |
| JN381856.1 | SH0410        | 10977              | China     | 2004 |
| JN381847.1 | SH03103       | 10965              | China     | 2003 |
| JF915894.1 | XZ0934        | 10983              | China     | 2009 |
| HQ652538.1 | XZ0938        | 10965              | China     | 2009 |
| JN381836.1 | YN0623        | 10965              | China     | 2006 |
| JF706268.1 | YN0967        | 10965              | China     | 2009 |
| JF706281.1 | YN05124       | 10965              | China     | 2005 |
| KX779521.1 | SC2016        | 10716              | China     | 2016 |

|            |             |       |           |      |
|------------|-------------|-------|-----------|------|
| LC623822.1 | Mo-Kagawa   | 10915 | Japan     | 2020 |
| MT232844.1 | Assam36     | 10965 | India     | 2015 |
| LC461960.1 | Mindanao-K4 | 10976 | China     | 2018 |
| KR265316.1 | Hubei       | 10976 | China     | 2015 |
| MH385014.1 | YN          | 10976 | China     | 2016 |
| KP164498.2 | IVRI395A    | 10976 | India     | 2014 |
| LC461961.1 | Bali93      | 10970 | Indonesia | 2017 |
| LC461958.1 | THA185      | 10967 | Thailand  | 2017 |
| KU871354.1 | BJ-1        | 10299 | China     | 1995 |

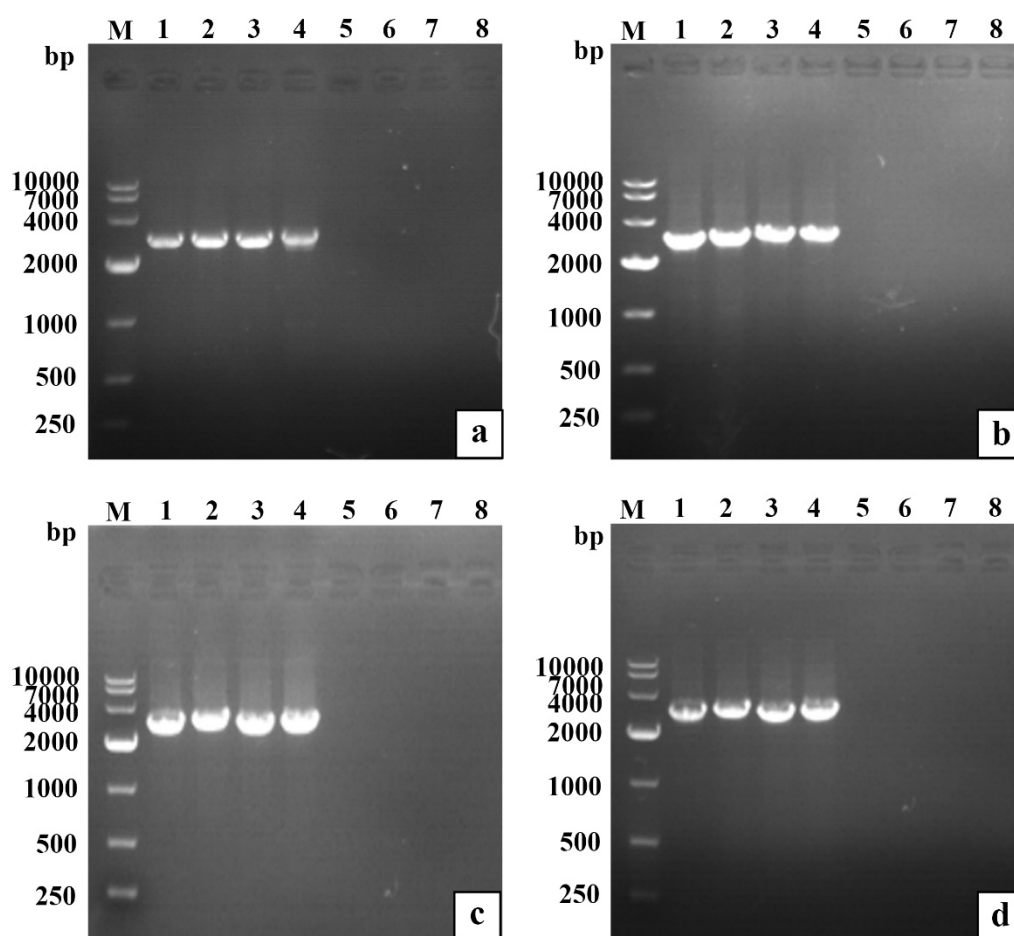

**Figure S1:** genomic amplification of four JEV isolates.a: CH/GD2011/2011 strains; b: CH/GD2014/2014 strains; c: CH/GD2015/2015 strains; d: CH/GD2018/2018 strains; M: DL2000 DNA marker; 1~4: Different JEV isolates were used as templates for amplification with JEV-P1-F/R Jev-P2-F /R Jev-P3-F /R and JEV-P4-F/R respectively; 5~8: ddH<sub>2</sub>O (negative control).

**Table S2. Virus content assay of pigs JEV isolates**

| Strain         | Virus titer (TCID <sub>50</sub> /mL) |    |                    |                   |                   |                    |                    |                    |                    |
|----------------|--------------------------------------|----|--------------------|-------------------|-------------------|--------------------|--------------------|--------------------|--------------------|
|                | F1 ~ F2                              | F3 | F4                 | F5                | F6                | F7                 | F8                 | F9                 | F10                |
| CH/GD2015/2015 | -                                    | -  | 10 <sup>6.43</sup> | 10 <sup>7.5</sup> | 10 <sup>8.2</sup> | 10 <sup>8.3</sup>  | 10 <sup>8.5</sup>  | 10 <sup>8.7</sup>  | 10 <sup>8.7</sup>  |
| CH/GD2011/2011 | -                                    | -  | 10 <sup>6.17</sup> | 10 <sup>7.3</sup> | 10 <sup>8.0</sup> | 10 <sup>8.17</sup> | 10 <sup>8.0</sup>  | 10 <sup>8.17</sup> | 10 <sup>8.17</sup> |
| CH/GD2014/2014 | -                                    | -  | 10 <sup>4.83</sup> | 10 <sup>6.0</sup> | 10 <sup>6.8</sup> | 10 <sup>7.83</sup> | 10 <sup>7.93</sup> | 10 <sup>7.83</sup> | 10 <sup>7.7</sup>  |
| CH/GD2018/2018 | -                                    | -  | 10 <sup>4.9</sup>  | 10 <sup>5.9</sup> | 10 <sup>6.7</sup> | 10 <sup>7.3</sup>  | 10 <sup>7.5</sup>  | 10 <sup>7.7</sup>  | 10 <sup>7.5</sup>  |

Note: “-” means undetermined.

**Table S3. Nucleotide sequence similarity analysis of the genes of JEV isolates**

| Gene       | Nucleotide similarity (%) |                |                |                |
|------------|---------------------------|----------------|----------------|----------------|
|            | CH/GD2011/2011            | CH/GD2014/2014 | CH/GD2015/2015 | CH/GD2018/2018 |
| Whole Gene | 78.4 ~ 99.2               | 77.9 ~ 98.3    | 78.4 ~ 97.4    | 78.0 ~ 98.3    |
| C          | 81.8 ~ 100.0              | 79.9 ~ 99.2    | 82.8 ~ 99.2    | 79.9 ~ 99.5    |
| PrM        | 77.8 ~ 99.6               | 79.4 ~ 99.6    | 77.6 ~ 97.6    | 79.6 ~ 98.8    |
| E          | 77.7 ~ 99.9               | 76.2 ~ 99.1    | 77.3 ~ 97.9    | 76.9 ~ 99.1    |
| NS1        | 77.8 ~ 99.9               | 77.9 ~ 99.2    | 77.7 ~ 98.0    | 77.7 ~ 99.2    |
| NS2a       | 76.9 ~ 100.0              | 76.9 ~ 99.3    | 77.8 ~ 98.5    | 76.4 ~ 98.7    |
| NS2b       | 78.6 ~ 100.0              | 78.4 ~ 99.2    | 79.9 ~ 98.0    | 78.9 ~ 99.0    |
| NS3        | 79.5 ~ 99.9               | 79.3 ~ 99.3    | 79.9 ~ 97.7    | 79.3 ~ 98.8    |
| NS4a       | 77.8 ~ 100.0              | 77.2 ~ 99.2    | 77.0 ~ 98.1    | 77.0 ~ 99.2    |
| NS4b       | 76.2 ~ 100.0              | 76.2 ~ 99.1    | 75.8 ~ 97.5    | 76.4 ~ 99.5    |
| NS5        | 80.0 ~ 99.9               | 79.8 ~ 99.1    | 79.7 ~ 97.9    | 79.4 ~ 98.9    |

**Table S4. Amino acid sequence similarity analysis of the gene of JEV isolates**

| Gene | Amino acid similarity (%) |                |                |                |
|------|---------------------------|----------------|----------------|----------------|
|      | CH/GD2011/2011            | CH/GD2014/2014 | CH/GD2015/2015 | CH/GD2018/2018 |
| C    | 81.3 ~ 100.0              | 79.7 ~ 99.2    | 82.1 ~ 98.4    | 78.9 ~ 99.2    |
| PrM  | 88.6 ~ 99.4               | 89.8 ~ 100.0   | 88.0 ~ 98.2    | 89.8 ~ 100.0   |
| E    | 89.6 ~ 99.8               | 91.2 ~ 100.0   | 91.2 ~ 99.2    | 91.2 ~ 100.0   |

|      |              |              |              |              |
|------|--------------|--------------|--------------|--------------|
| NS1  | 90.6 ~ 100.0 | 91.2 ~ 100.0 | 91.5 ~ 99.7  | 91.2 ~ 100.0 |
| NS2a | 83.7 ~ 100.0 | 84.6 ~ 100.0 | 84.1 ~ 97.4  | 84.6 ~ 100.0 |
| NS2b | 92.4 ~ 100.0 | 90.8 ~ 99.2  | 93.9 ~ 100.0 | 91.6 ~ 100.0 |
| NS3  | 94.0 ~ 99.8  | 94.5 ~ 100.0 | 94.7 ~ 99.8  | 94.5 ~ 100.0 |
| NS4a | 94.4 ~ 100.0 | 93.7 ~ 100.0 | 94.4 ~ 100.0 | 93.7 ~ 100.0 |
| NS4b | 91.4 ~ 100.0 | 91.0 ~ 100.0 | 91.8 ~ 100.0 | 90.6 ~ 100.0 |
| NS5  | 91.8 ~ 99.9  | 92.0 ~ 99.8  | 92.0 ~ 99.8  | 92.2 ~ 100.0 |

**Table S5 Common phosphorylation sites of E proteins of JEV isolates and their corresponding kinases**

| Site | Score | Kinase | Site | Score | Kinase | Site | Score | Kinase  |
|------|-------|--------|------|-------|--------|------|-------|---------|
| T40  | 0.591 | PKC    | Y183 | 0.615 | EGFR   | S344 | 0.966 | unsp    |
| S51  | 0.564 | DNAPK  | Y183 | 0.599 | unsp   | T349 | 0.558 | p38MAPK |
| T66  | 0.662 | PKC    | T187 | 0.738 | unsp   | T349 | 0.524 | cdk5    |
| T70  | 0.824 | PKC    | T187 | 0.552 | CKII   | T356 | 0.566 | PKC     |
| T76  | 0.844 | unsp   | S194 | 0.954 | unsp   | T363 | 0.747 | PKC     |
| T76  | 0.596 | PKG    | Y202 | 0.655 | unsp   | S364 | 0.571 | unsp    |
| S88  | 0.985 | unsp   | T205 | 0.853 | PKC    | S365 | 0.667 | PKC     |
| S88  | 0.56  | PKA    | S210 | 0.787 | unsp   | S368 | 0.785 | unsp    |
| S89  | 0.816 | PKC    | S227 | 0.871 | unsp   | Y382 | 0.973 | unsp    |
| Y90  | 0.95  | unsp   | S227 | 0.517 | cdk5   | Y382 | 0.553 | INSR    |
| Y90  | 0.506 | EGFR   | S230 | 0.586 | PKC    | S401 | 0.773 | PKC     |
| T97  | 0.702 | PKC    | S251 | 0.64  | PKA    | S401 | 0.565 | cdc2    |
| S112 | 0.586 | PKA    | S257 | 0.621 | DNAPK  | T402 | 0.786 | PKC     |
| T115 | 0.749 | PKC    | S257 | 0.532 | unsp   | S408 | 0.62  | PKC     |
| T122 | 0.902 | PKC    | Y301 | 0.518 | SRC    | S408 | 0.518 | cdc2    |
| Y137 | 0.503 | unsp   | T305 | 0.669 | PKC    | T409 | 0.537 | cdc2    |
| T147 | 0.665 | unsp   | S309 | 0.653 | PKC    | T410 | 0.854 | unsp    |
| T148 | 0.627 | unsp   | T317 | 0.918 | unsp   | T410 | 0.737 | PKC     |
| T148 | 0.548 | PKC    | S327 | 0.591 | CKI    | S429 | 0.618 | CKI     |
| S162 | 0.666 | PKC    | S329 | 0.996 | unsp   | T460 | 0.554 | DNAPK   |
| S162 | 0.604 | DNAPK  | T168 | 0.577 | PKG    | T460 | 0.55  | cdc2    |
| S162 | 0.539 | ATM    | S479 | 0.586 | PKG    | S479 | 0.784 | PKA     |

**Table S6 Different phosphorylation sites of E proteins of JEV isolates and their corresponding kinases**

| Strain             | Site | Score | Kinase | Site | Score | Kinase | Site | Score | Kinase |
|--------------------|------|-------|--------|------|-------|--------|------|-------|--------|
| CH/GD2015/<br>2015 | T232 | 0.823 | unsp   | S327 | 0.727 | unsp   | Y137 | 0.693 | unsp   |
|                    | T232 | 0.722 | PKC    | S329 | 0.528 | cdc2   | Y137 | 0.518 | INSR   |
|                    | S277 | 0.818 | PKC    | S88  | 0.985 | unsp   | S331 | 0.537 | PKC    |
|                    | S277 | 0.528 | unsp   | S88  | 0.56  | PKA    | S368 | 0.519 | CKI    |
|                    | T281 | 0.575 | PKC    | S89  | 0.816 | PKC    | T231 | 0.692 | PKC    |
|                    | S282 | 0.507 | PKC    | S129 | 0.57  | PKA    |      |       |        |
| CH/GD2011/<br>2011 | S123 | 0.502 | CKI    | S329 | 0.528 | cdc2   | S331 | 0.537 | PKC    |
|                    | S257 | 0.521 | ATM    | S331 | 0.537 | PKC    | S368 | 0.519 | CKI    |
|                    | S327 | 0.727 | unsp   | S329 | 0.528 | cdc2   |      |       |        |
| CH/GD2014/<br>2014 | S222 | 0.532 | cdc2   | T226 | 0.501 | PKC    | S277 | 0.528 | unsp   |
|                    | S222 | 0.531 | DNAPK  | S257 | 0.502 | ATM    | T281 | 0.575 | PKC    |
|                    | S222 | 0.518 | PKA    | S277 | 0.818 | PKC    | S282 | 0.507 | PKC    |
|                    | T226 | 0.504 | GSK3   |      |       |        |      |       |        |
| CH/GD2018/<br>2018 | S222 | 0.532 | cdc2   | T226 | 0.501 | PKC    | S277 | 0.528 | unsp   |
|                    | S222 | 0.531 | DNAPK  | S257 | 0.502 | ATM    | T281 | 0.575 | PKC    |
|                    | S222 | 0.518 | PKA    | S277 | 0.818 | PKC    | S282 | 0.507 | PKC    |
|                    | T226 | 0.504 | GSK3   |      |       |        |      |       |        |

**Table S7 B-cell antigenic epitopes of JEV isolate E protein**

| Strain                             | Number | B-cell epitope sequence | Starting point of amino acid position | Confidence value |
|------------------------------------|--------|-------------------------|---------------------------------------|------------------|
| CH/GD2011/2011 和<br>CH/GD2015/2015 | 1      | GMSWITQGLMGALLLW        | 455                                   | 0.97             |
|                                    | 2      | YGEVTLDCPEPRSGCNT       | 183                                   | 0.95             |
|                                    | 3      | DGPCKIPIVSVASLND        | 332                                   | 0.91             |
|                                    | 4      | VLEGDSCLTIMANDKP        | 24                                    | 0.91             |
|                                    | 5      | AALGDTAWDFGSIGGV        | 418                                   | 0.9              |
| CH/GD2014/2014 和<br>CH/GD2018/2018 | 1      | GMSWITQGLMGALLLW        | 455                                   | 0.97             |
|                                    | 2      | YGEVTLDCPEPRSGCNT       | 183                                   | 0.95             |
|                                    | 3      | DGPCKIPIVSVASLND        | 332                                   | 0.91             |
|                                    | 4      | VLEGDSCLTIMANDKP        | 24                                    | 0.91             |
|                                    | 5      | AALGDTAWDFGSIGGV        | 418                                   | 0.9              |
|                                    | 6      | LSLPWTSPSSTAWRNR        | 221                                   | 0.9              |
